# Supplementary material for: Development of Glomerulus-, Tubule-, and Collecting Duct-Specific mRNA Assay in Human Urinary Exosomes and Microvesicles
Source: PLOS journal article supplement (doi:10.1371/journal.pone.0109074), 2014-10-02

**Figure S1. Scanning electron microscope (SEM) analysis of EMV capture material**

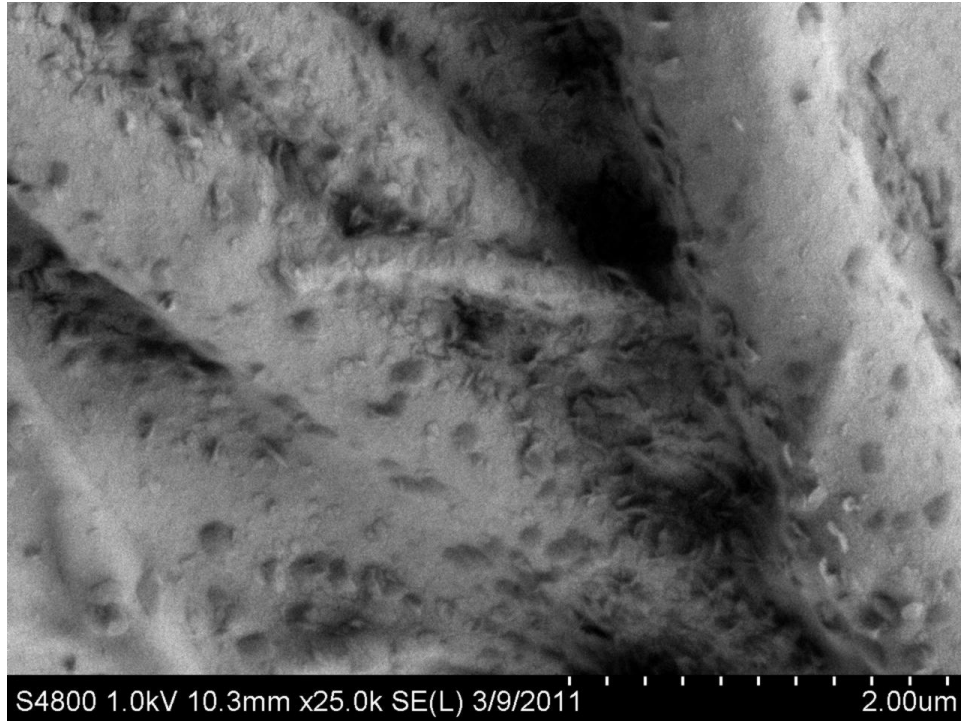

Supplement: S1 (10.1371/journal.pone.0109074.s001) [file journal.pone.0109074.s001]
